# Supplementary material
Source: Springer Nature journal article supplement (https://www.springermedizin.de/resource/supplementary/13054_2012_982_MOESM4_ESM.pdf/9709746)

$\Delta$ Serum K level

New-onset AKI

Infection

Bleeding

Need for ICU care

During ICU care

Malignancy

Emergent admission

MOF at diagnosis

Cardiac arrest as symptom

Beta-blocker

0.1 1 10 100

Odds ratio (95% CI) for In-hospital mortality

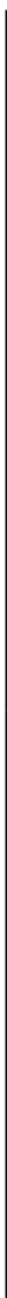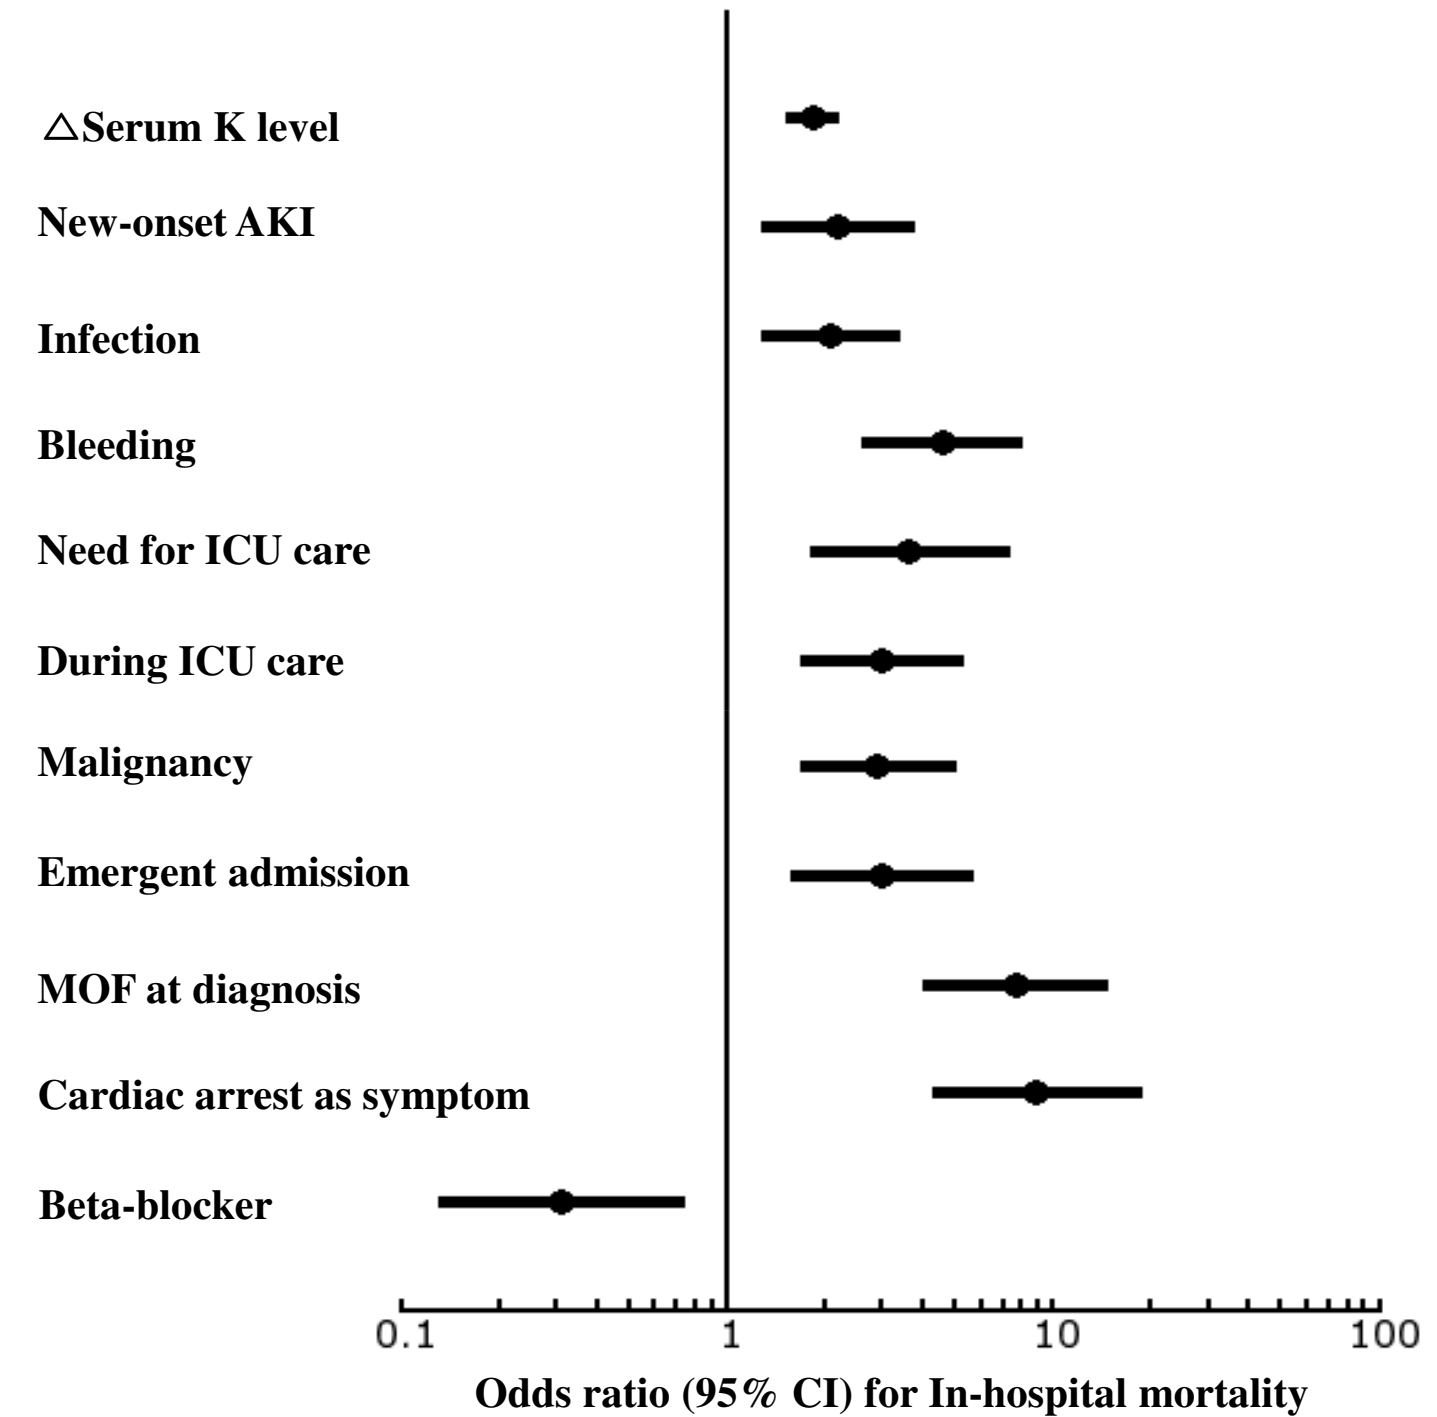

Supplement: MOESM4 [file 9709746]
